# Supplementary material for: Mesenchymal Stromal Cell-Conditioned Medium for Skin Diseases: A Systematic Review
Source: PubMed Central journal article supplement (PMC8343397; doi:10.3389/fcell.2021.654210), 2021-07-23
Supplement: Table_1.pdf [file Table_1.pdf]

**Table S1. Studies regarding mesenchymal stem cell- conditioned medium for treating wounds combined with other treatments.**

|                                | MSC source        | Method of tissue extraction | MSC characterisation                                 | Preparation of MSC-CM                                                 | Model                                                                                                | Groups of treatments and via of administration                                                                                                                                           | Follow-up (days) | Assessment                                                       | Main outcome                                                                                                                                            | Other outcomes                                                                                                                                                                                      |
|--------------------------------|-------------------|-----------------------------|------------------------------------------------------|-----------------------------------------------------------------------|------------------------------------------------------------------------------------------------------|------------------------------------------------------------------------------------------------------------------------------------------------------------------------------------------|------------------|------------------------------------------------------------------|---------------------------------------------------------------------------------------------------------------------------------------------------------|-----------------------------------------------------------------------------------------------------------------------------------------------------------------------------------------------------|
| <b>Bagheri M et al. 2018</b>   | Human bone marrow | Aspiration                  | Flow cytometry (CD73+, CD90+, CD105+, CD34-, CD45-)  | MSCs of passage 4 at 80% confluence were used. CM was collected.      | Murine. Diabetic rat model. Full-thickness skin wounds, 12 mm, on upper back.                        | PBM was administered once daily, 6 days per week. CM was administered day 0 and 1 intraperitoneally.<br>- DMEM vehicle (control),<br>- MSCs-CM,<br>- PBM<br>- PMB+ MSCs-CM. (n=18/group) | 15               | Stereological methods, tensiometric examination                  | MSCs-CM and PBM+ MSCs-CM increased the tensiometric properties compared to DMEM and PBM.                                                                | MSCs-CM, PBM and PBM+ MSCs-CM groups showed a significant decrease in the three types of mast cells and in the total number of mast cells compared with controls                                    |
| <b>Amini A et al. 2018</b>     | Human bone marrow | Aspiration                  | Flow cytometry (CD73+, CD90+, CD105+, CD34-, CD45-)  | MSCs of passage 4 at 80% confluence were used. CM was collected.      | Murine. Diabetic rat model. Full-thickness skin wounds, 12 mm, on upper thoracic and lumbar regions. | PBM was administered once daily, 6 days per week. CM was administered day 0 and 1 intraperitoneally.<br>- DMEM vehicle (control),<br>- MSCs-CM,<br>- PBM<br>- PMB+ MSCs-CM. (n=18/group) | 15               | Stereological methods, tensiometric examination, qRT-PCR         | All treated groups significantly enhanced wound healing compared to controls. The extent of healing was significantly greater in the MSCs-CM+PBM group. | Number of fibroblast and epidermal cells, the lengths of blood vessels, bFGF and SDF-1 $\alpha$ expression were significantly higher in MSCs-CM+PBM group.                                          |
| <b>Pouriran R et al. 2016.</b> | Human bone marrow | Aspiration                  | Flow cytometry (CD105+, CD90+, CD73+, CD34-, CD45-). | MSCs of passage 4 at 80% confluence were used. CM was then collected. | Murine. Diabetic rat model. Full-thickness skin wounds, 12mm, on the thoracic and lumbar regions.    | PWLLLT was administered once daily, 6 days per week. MSCs-CM was administered twice intraperitoneally<br>- Non treated,<br>- MSCs-CM,<br>- PWLLLT,<br>- MSCs-CM+PWLLLT (n=7/group)       | 15               | Macroscopic appearance (photography), biomechanical examination. | PWLLLT and MSCs-CM, alone or in combination, improved biomechanical parameters in the wound.                                                            | PWLLLT was more effective compared to MSCs-CM.                                                                                                                                                      |
| <b>Kouhkeil R et al. 2019</b>  | Human bone marrow | Aspiration                  | Flow cytometry                                       | MSCs of passage 4 at 80% confluence were used. CM was collected.      | Murine. MRSA rats infected. Full-thickness excisional wound, 15 mm, on the back.                     | PBM was administered once daily, 6 days per week. 50 $\mu$ l of the 10-fold CM were administered from day zero until day 3.                                                              | 15               | Clinical observation, microbiological, tensiometrical, and       | There was a significant decrease in colony-forming units in PBM+ MSCs-CM and PBM groups compared to controls.                                           | PBM+MSCs-CM, PBM, and MSCs-CM groups significantly increased wound strength compared with the control group. The PBM+ MSCs-CM and PBM groups had more stable MCs, less significant degranulated and |

|                                  |                         |            |                                                                         |                                                      |                                                                                                                  |                                                                                                                                                                                                                                       |    |                           |                                                 |                                                                                                                                                                                                                                |
|----------------------------------|-------------------------|------------|-------------------------------------------------------------------------|------------------------------------------------------|------------------------------------------------------------------------------------------------------------------|---------------------------------------------------------------------------------------------------------------------------------------------------------------------------------------------------------------------------------------|----|---------------------------|-------------------------------------------------|--------------------------------------------------------------------------------------------------------------------------------------------------------------------------------------------------------------------------------|
|                                  |                         |            |                                                                         |                                                      |                                                                                                                  | -Control<br>- PBM<br>- MSCs-CM<br>- PBM + MSCs-CM<br>(n=18/group)                                                                                                                                                                     |    | stereological<br>analyses |                                                 | disintegrated MCs and less significant<br>total number of MCs compared with<br>the control group.                                                                                                                              |
| <b>Fridoni M<br/>et al. 2019</b> | Human<br>bone<br>marrow | Aspiration | Flow<br>cytometry<br>(CD105+,<br>CD90+,<br>CD73+,<br>CD34-, CD45-<br>). | MSCs of passage<br>4 were used. CM<br>was collected. | Murine. MRSA<br>diabetic rats<br>infected. Full -<br>thickness<br>wound, 15mm<br>diameter round,<br>on the back. | PBM was administered<br>once daily, 6 days per<br>week. 500 µl of the 10-<br>fold CM were injected<br>intraperitoneally daily<br>from day 0 until day 3.<br>-Control group,<br>- PBM,<br>- MSCs-CM<br>- PBM+ MSCs-CM.<br>(n=18/group) | 15 | Histology (HE),<br>IHC    | PBM+ MSCs-CM hastened wound<br>healing process. | PBM+ MSCs-CM, MSCs-CM, and<br>PBM groups showed a decrease in the<br>number of neutrophils and<br>macrophages and an increase in the<br>number of fibroblasts and<br>angiogenesis compared with those of<br>the control group. |

AT, Adipose tissue-derived; bFGF, basic fibroblast growth factor; AF, Amniotic fluid; BM, bone marrow; CM, Conditioned Medium; DFX, deferoxamine; DMEM, Dulbecco's Modified Eagle Medium; DP, dental pulp; EC: Endothelial-differentiated; ECM, extracellular matrix; EGF, epidermal growth factor; ELISA, Enzyme-linked immunosorbent assay; EVs, extracellular vesicles; exos; exosomes; HE, haematoxylin and eosin; hCB: human cord blood; hESC, human embryonic stem cell; IHC, immunohistochemistry; IF, immunofluorescence; MPF, micro-nano polylactic acid electrospun fibre; MSCs, Mesenchymal Stem Cells; MT, Masson's Trichrome; PBM, photobiomodulation; PBS, phosphate-buffered saline; PWLLLT, Pulsed Wave Low-Level Laser Therapy; qRT-PCR, real-time quantitative polymerase chain reaction; SVF, stromal vascular fraction; UCM, unconditioned medium; WB, Western blot; WJ, Wharton's jelly.
